# Supplementary material for: Development and experimental verification of a genome-scale metabolic model for Corynebacterium glutamicum
Source: PubMed Central journal article supplement (PMC2728707; doi:10.1186/1475-2859-8-43), 2009-08-03

(a)

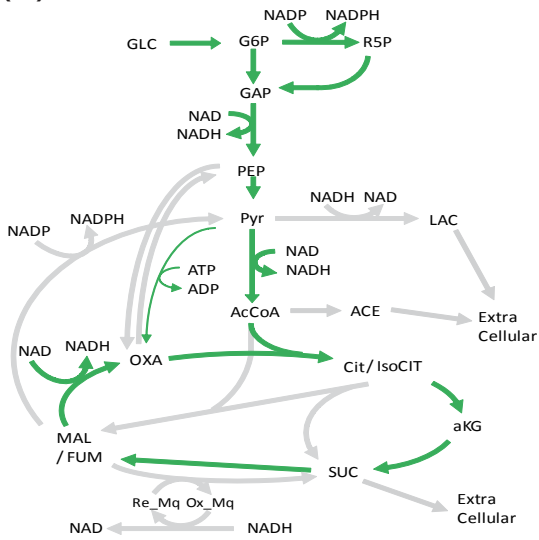

(b)

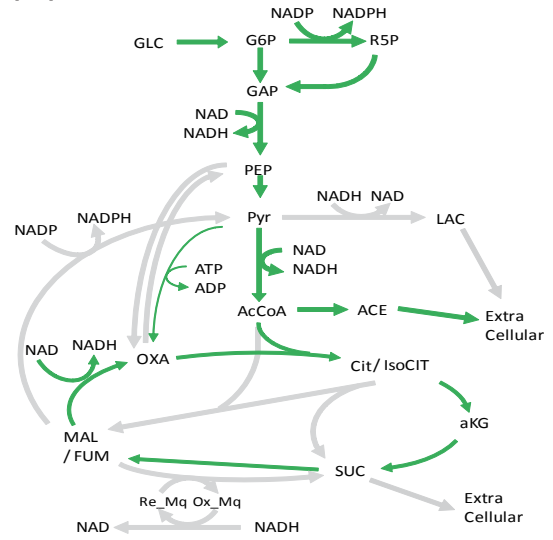

(c)

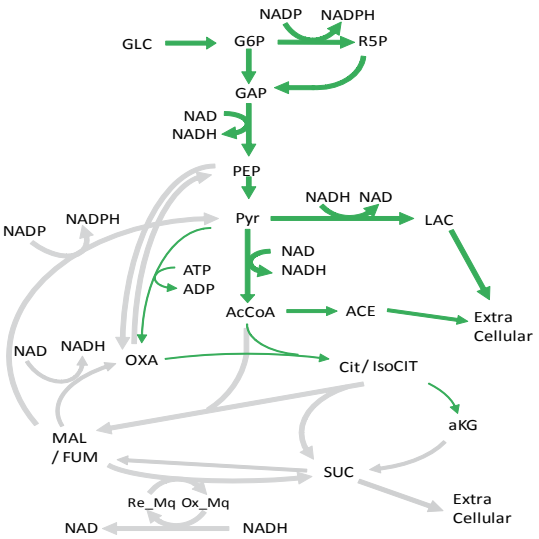

(d)

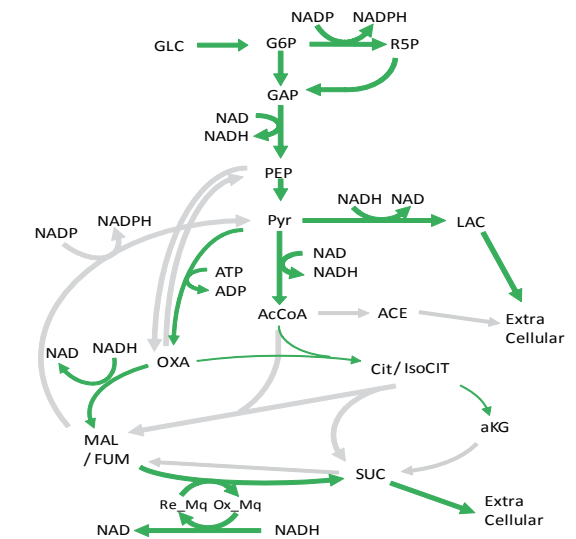

(e)

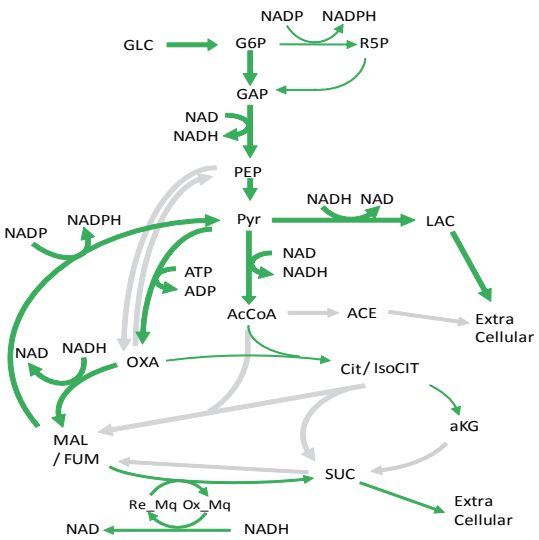

Supplement: 1475-2859-8-43-S4.pdf [file 1475-2859-8-43-S4.pdf]
