# Supplementary material for: Development and experimental verification of a genome-scale metabolic model for Corynebacterium glutamicum
Source: PubMed Central journal article supplement (PMC2728707; doi:10.1186/1475-2859-8-43), 2009-08-03
Supplement: 1475-2859-8-43-S5.pdf [file 1475-2859-8-43-S5.pdf]

## Additional file 5

|                                                                                 | Previous model [25] | Our model   |
|---------------------------------------------------------------------------------|---------------------|-------------|
| <b>Number of reactions in genome scale model</b>                                | 446                 | 502         |
| <b>Number of metabolites in genome-scale model</b>                              | 411                 | 423         |
| <b>Inadequate reaction loop that allows arbitrary generation of metabolites</b> | Include             | Not include |
| <b>Representation of metabolic state in micro-aerobic condition</b>             | Difficult           | Possible    |
